# Supplementary material
Source: PubMed Central journal article supplement (PMC3796374)
Supplement: supp_cwt057_cwt057supp.pdf [file supp_cwt057_cwt057supp.pdf]

## SUPPLEMENTARY DATA

**Table S1.** List of proteins used in the phylogenetic analysis.

|    |                                         |
|----|-----------------------------------------|
| 1  | jgi 129416 Ceriporiopsis/1-449          |
| 2  | EGN98663.1 Serpula/1-440                |
| 3  | EAK83082.1 Ustilago/1-386               |
| 4  | jgi 121644 Fomitiporia/1-494            |
| 5  | jgi 78388 Auricularia/1-506             |
| 6  | jgi 41987 Coniophora/1-490              |
| 7  | jgi 52833 Rhodotorula/1-357             |
| 8  | EFJ02265.1 238-698 Schizophyllum/1-461  |
| 9  | jgi 392714 Heterobasidion/1-477         |
| 10 | EDR15581.1 Laccaria/1-446               |
| 11 | jgi 113595 Ganoderma/1-470              |
| 12 | jgi 148196 Gymnopus/1-515               |
| 13 | EDP43994.1 Malassezia/1-356             |
| 14 | jgi 120089 Jaapia/1-464                 |
| 15 | jgi 33049 Sporobolomyces/1-364          |
| 16 | jgi 123931 Stereum/1-491                |
| 17 | EFP75931.1 Puccinia/1-370               |
| 18 | AAW43133.1 Cryptococcus/1-389           |
| 19 | CBQ72626.1 378-767 Sporisorium/1-390    |
| 20 | CNAG_01385 Cryptococcus/1-391           |
| 21 | jgi 117371 Agaricus/1-467               |
| 22 | jgi 151176 Dichomitus/1-472             |
| 23 | jgi 233482 Galerina/1-439               |
| 24 | jgi 26317 Phlebia/1-452                 |
| 25 | jgi 69710 Fomitopsis/1-483              |
| 26 | jgi 172856 Botryobasidium/1-554         |
| 27 | jgi 182294 Agaricus/1-476               |
| 28 | jgi 83334 Phanerochaete/1-450           |
| 29 | jgi 448758 Hebeloma/1-444               |
| 30 | jgi 64646 Paxillus/1-467                |
| 31 | jgi 129444 Punctularia/1-493            |
| 32 | jgi 61473 Wallemia/1-402                |
| 33 | ADV24329.1 Cryptococcus/1-392           |
| 34 | jgi 145354 Bjerkandera/1-447            |
| 35 | jgi 39553 Tremella/1-392                |
| 36 | jgi 25742 Trametes/1-456                |
| 37 | jgi 135302 Gloeophyllum/1-462           |
| 38 | jgi 135257 Wolfiporia/1-473             |
| 40 | CCA73538.1 554-950 Piriformospora/1-397 |
| 41 | jgi 25863 Phlebiopsis/1-449             |
| 42 | jgi 1111534 Pleurotus/1-461             |
| 43 | jgi 56170 Plicaturopsis/1-455           |

**Table S2.** *C. neoformans* var. *grubii* strains used in this work.

| <b>Strain</b>     | <b>Designation</b>           | <b>Relevant genotype</b>                                                 | <b>References</b>                     |
|-------------------|------------------------------|--------------------------------------------------------------------------|---------------------------------------|
| TDY-451           | KN99 $\alpha$                | Wild type                                                                | (Nielsen, K., Cox, G.M., et al. 2003) |
| TDY-1212          | H99 <i>ggt1</i> $\Delta$     | <i>ggt1</i> $\Delta$ :: <i>NAT</i>                                       | This study                            |
| SMA-646           | <i>csg1</i> $\Delta$         | <i>csg1</i> $\Delta$ :: <i>NAT</i>                                       | This study                            |
| TDY-1267          | <i>GGT1</i> <sub>empty</sub> | <i>ggt1</i> $\Delta$ :: <i>NAT</i> pIBB103                               | This study                            |
| TDY-1268,<br>1269 | <i>GGT1</i> <sub>long</sub>  | <i>ggt1</i> $\Delta$ :: <i>NAT</i> pIBB103- <i>GGT1</i> <sub>long</sub>  | This study                            |
| TDY-1270          | <i>GGT1</i> <sub>short</sub> | <i>ggt1</i> $\Delta$ :: <i>NAT</i> pIBB103- <i>GGT1</i> <sub>short</sub> | This study                            |

**Table S3.** Primers used in gene disruption and *CnGGT1* cloning. The sequence indicated in bold is complementary to the M13 primers used to amplify the resistance gene and mediate the overlap PCR used to assemble the disruption cassette. Restriction sites are underlined.

| Primer  | Sequence (5' to 3')                                           | Comment                   |
|---------|---------------------------------------------------------------|---------------------------|
| Csg1-L1 | CCCCGAAGCCAAATAATCCACG                                        | 5'-flanking reg.          |
| Csg1-L2 | <b>CTGGCCGTCGTTTTAC</b> GTGGGGGGATTGTATCTTGCC                 | 5'-flanking reg.          |
| Csg1-R1 | <b>GTCATAGCTGTTTCCTG</b> GGGAAACGTTAAGGGATAAGGGTC             | 3'-flanking reg.          |
| Csg1-R2 | GTTACACAATCTAATAAGCCGCACG                                     | 3'-flanking reg.          |
| Ggt1-L1 | CTTATTGACTCTCGTGCCCGTC                                        | 5'-flanking reg.          |
| Ggt1-L2 | <b>CTGGCCGTCGTTTTACT</b> GCGCTCTGTACATGCCATTC                 | 5'-flanking reg.          |
| Ggt1-R1 | <b>TCATAGCTGTTTCCTG</b> GCTTAAGAAGGAAGTCGGCCTG                | 3'-flanking reg.          |
| Ggt1-R2 | GCACCAGCAAGCAATTGGAAC                                         | 3'-flanking reg.          |
| M13fwd  | GTAAAACGACGGCCAG                                              |                           |
| M13rev  | CAGGAAACAGCTATGAC                                             |                           |
| AM84    | CATGCC <u>ACTAGT</u> GCTGCGAGGATGTGAGCTGG                     | $P_{ACT}$ , sense         |
| AM87    | CTGTCATGAGCAT <u>GGGCCCTCCTT</u> GTTTGCAATAACACG              | $GGT1_{long}$ , antisense |
| AM92    | TAGCTT <u>GGGCCCTACAGT</u> <u>GGCGCGCC</u> GGGCGAGTTTACTAATGG | $P_{ACT1}$ , antisense    |
| AM93    | ACTGT <u>AGGCGCGCC</u> ATGCCTTTCCACGC                         | $GGT1_{long}$ , sense     |
| AM94    | ACTGT <u>AGGCGCGCC</u> ATGCCTCAAGCGGATCTC                     | $GGT1_{short}$ , sense    |

**A**

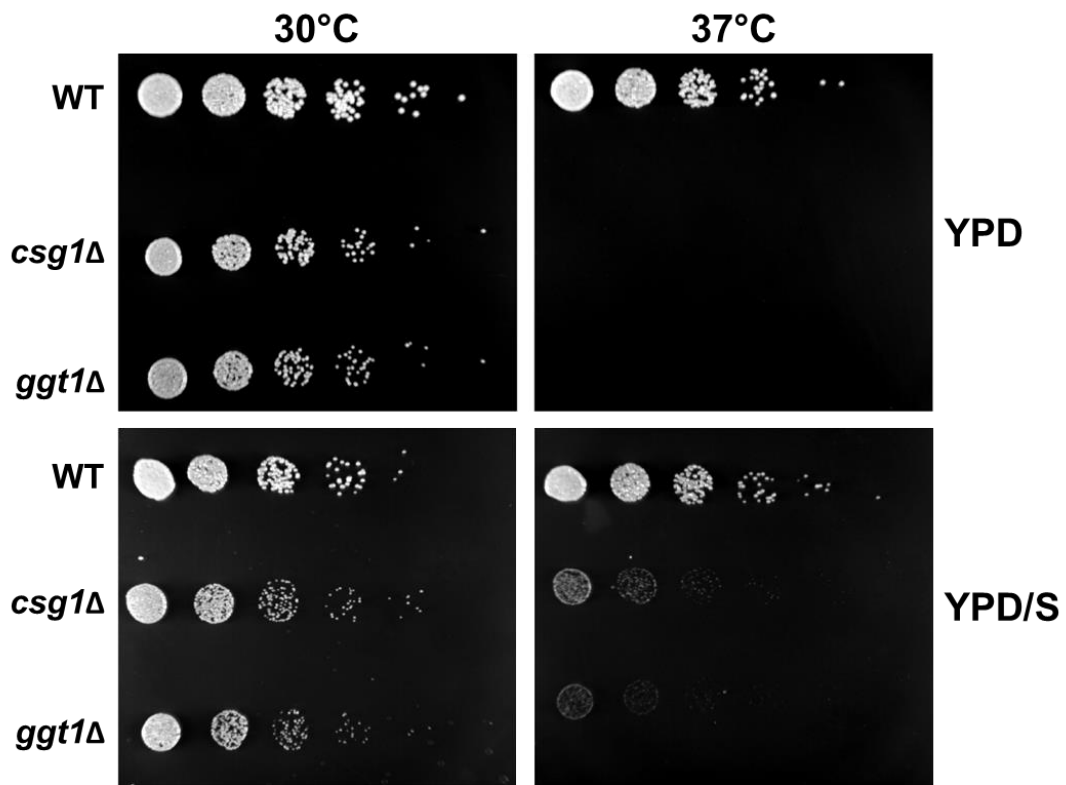

**B**

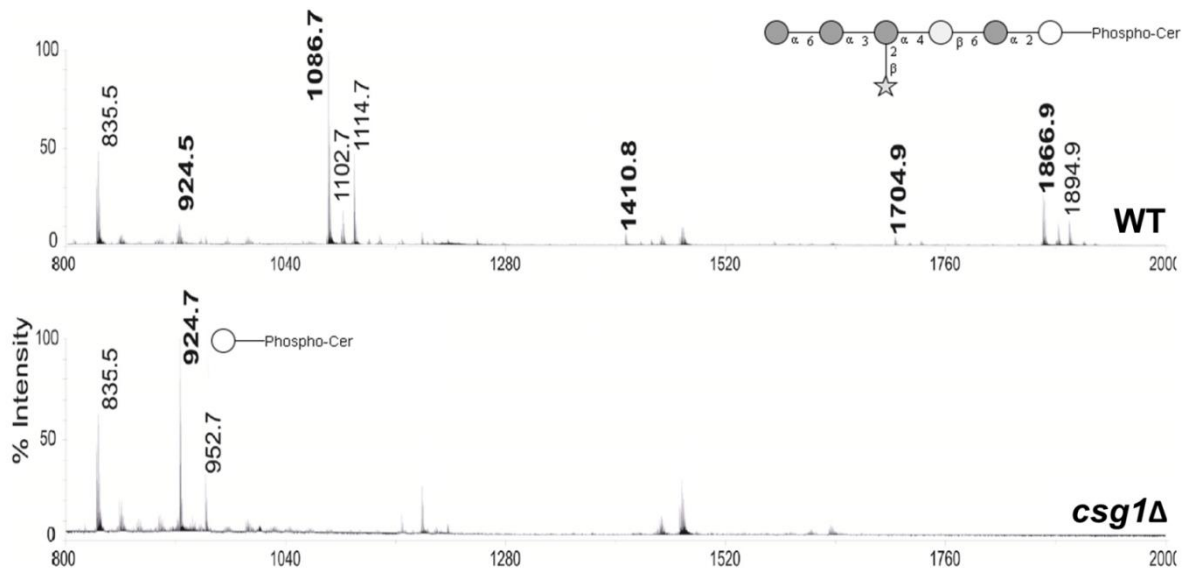

**Fig. S1.** Growth of *C. neoformans* *csg1* $\Delta$  and *ggt1* $\Delta$  mutants on rich culture medium with and without sorbitol and GIPC structure of *C. neoformans* *csg1* $\Delta$  mutant. **(A)** *C. neoformans* wild type (WT), the *csg1* $\Delta$  mutant lacking the first mannosyltransferase, and the *ggt1* $\Delta$  mutant deficient in the successive galactosyltransferase were grown in rich liquid culture medium (YPD). A five-fold dilution series starting at OD<sub>600</sub> of 0.1 was prepared and equal volumes were spotted on YPD agar plates with (YPD/S) and without (YPD) the osmotic stabilizing agent sorbitol (1M). Plates were incubated at either 30°C or 37°C. **(B)** For GIPC analysis by MALDI-MS lipids were extracted from *C. neoformans* WT and *csg1* $\Delta$  mutant and analyzed as described in Materials and Methods. The numbers in bold indicate masses (Da) of GIPC. In most cases GIPC species are accompanied by two adjacent peaks corresponding to derivatives with an additional hydroxyl-group (+16) or extended fatty acid moiety (C2:+28), as previously reported (Guan, X.L. and Wenk, M.R. 2006, Heise, N., Gutierrez, A.L., et al. 2002). 924.5: IPC; 1086.7: MIPC; 1866.9: GIPC with hexasaccharide; 1410.8: GIPC with trisaccharide; 1704.9: GIPC with pentasaccharide; 835.6: PI; other masses could not be assigned. White circle: inositol; dark grey circle: mannose; light grey circle: galactose; star: xylose.

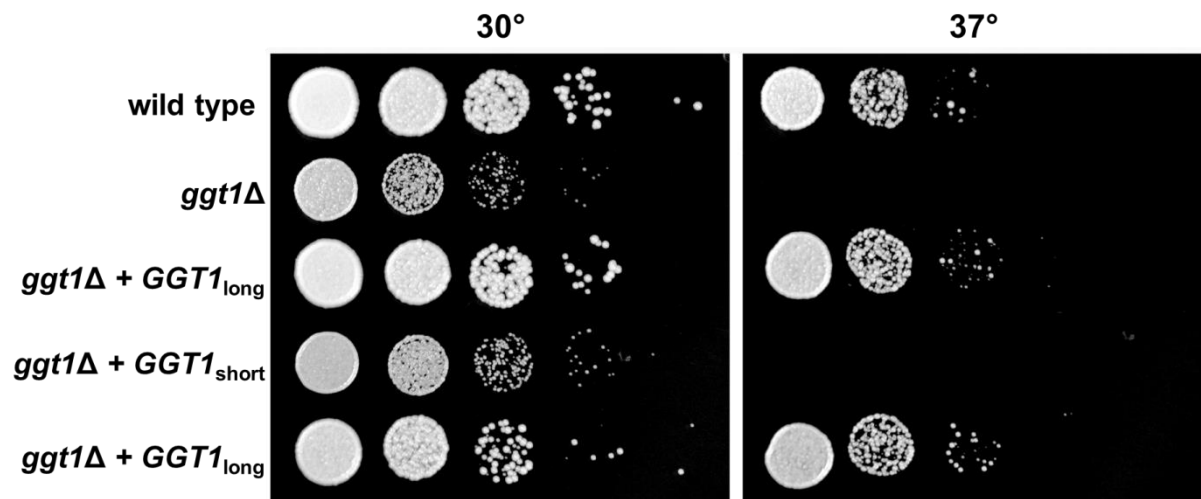

**Fig. S2.** Episomal expression of *GGT1* in *C. neoformans* on YPD + G418. Serial 10-fold dilutions of the indicated strains were spotted on YPD plates containing G418 and incubated at the indicated temperatures for three days. Two independent transformants are shown for the plasmid containing the long form of the gene.

A

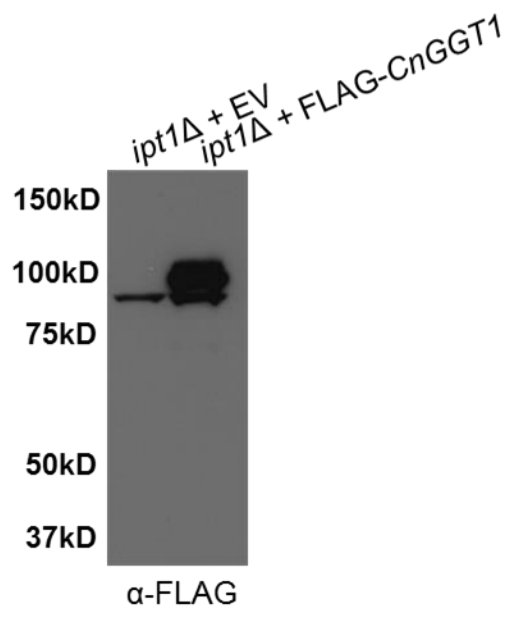

**B**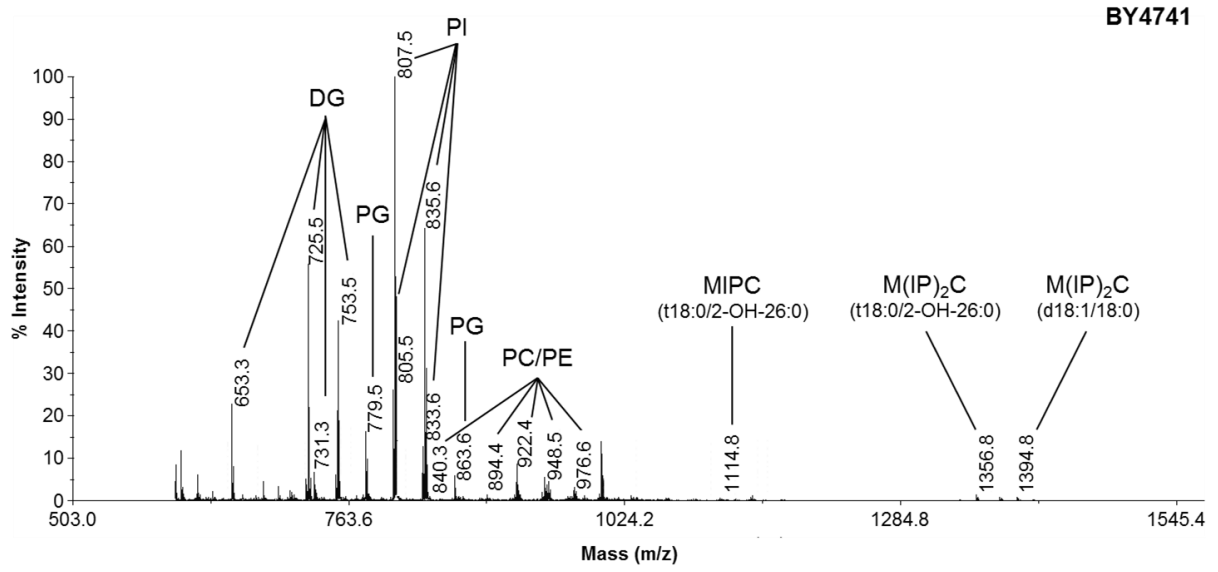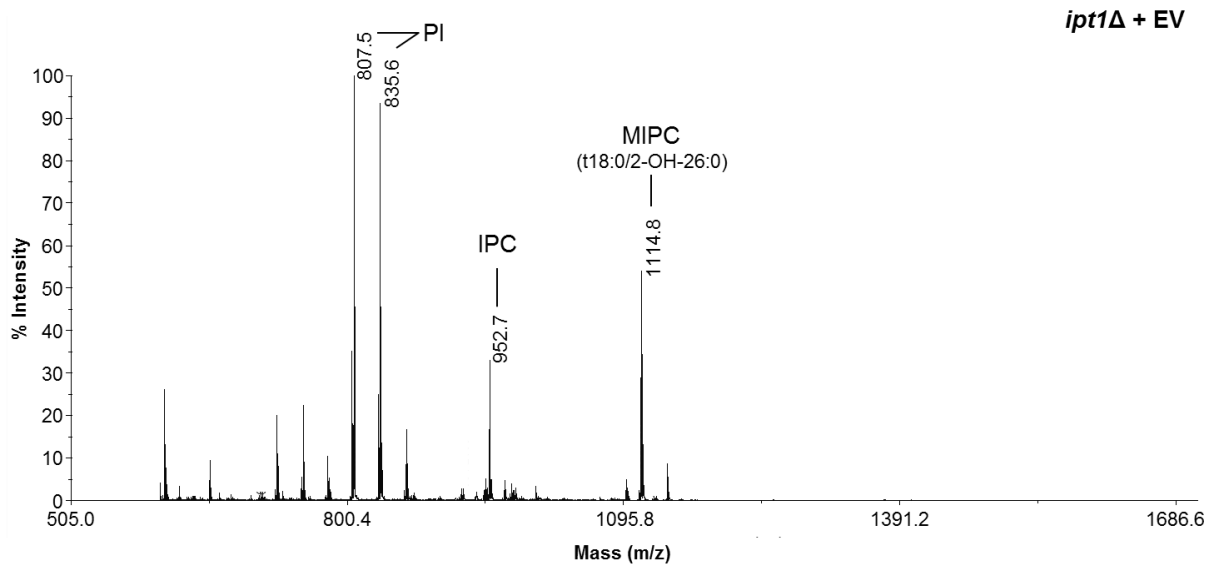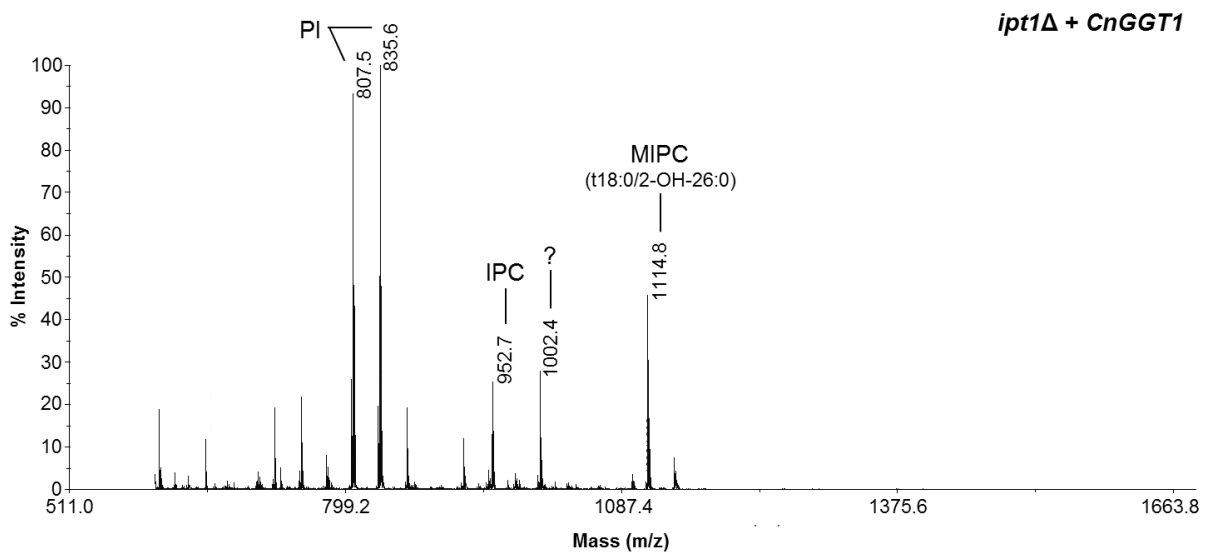



**Figure S3.** Heterologous expression of *CnGGT1* in *Saccharomyces cerevisiae*. **(A)** The *CnGGT1* ORF was N-terminally FLAG-tagged and cloned into a low-copy pRS415 vector under the control of the GPD promoter. FLAG-*CnGGT1* was expressed in an *ipt1* $\Delta$  *S. cerevisiae* strain (EUROSCARF BY474 *ipt1::kanMX4*) at 30°C overnight. Western blot analysis with an anti-FLAG antibody confirmed expression of CnGgt1 in *S. cerevisiae*. **(B)** GIPCs were extracted from *S. cerevisiae* wild type (BY4741), *ipt1* $\Delta$  harboring the empty vector (*ipt1* $\Delta$  + EV) and *ipt1* $\Delta$  expressing *CnGGT1* (*ipt1* $\Delta$  + *CnGGT1*) as described in Materials and Methods. Peaks at m/z of 1114.8 and 1356.8/1394.8 correspond to MIPC and M(IP)<sub>2</sub>C, respectively. M(IP)<sub>2</sub>C was detected in *S. cerevisiae* BY4741 but was absent in the *ipt1* $\Delta$  strain as previously described (Dickson, R.C., Nagiec, E.E., et al. 1997). Absence of a peak at 1276.78 m/z in the *ipt1* $\Delta$  + *CnGGT1* spectrum indicates that no Gal-MIPC is synthesized in *S. cerevisiae* upon heterologous expression of *CnGGT1*. The same result was obtained for C-terminally FLAG-tagged *CnGGT1* ORF (data not shown).

## REFERENCES

Dickson RC, Nagiec EE, Wells GB, Nagiec MM, Lester RL. 1997. Synthesis of mannose-(inositol-P)<sub>2</sub>-ceramide, the major sphingolipid in *Saccharomyces cerevisiae*, requires the IPT1 (YDR072c) gene. *J Biol Chem*, 272:29620-29625.

Guan XL, Wenk MR. 2006. Mass spectrometry-based profiling of phospholipids and sphingolipids in extracts from *Saccharomyces cerevisiae*. *Yeast*, 23:465-477.

Heise N, Gutierrez AL, Mattos KA, Jones C, Wait R, Previato JO, Mendonca-Previato L. 2002. Molecular analysis of a novel family of complex glycoinositolphosphoryl ceramides from *Cryptococcus neoformans*: structural differences between encapsulated and acapsular yeast forms. *Glycobiology*, 12:409-420.

Nielsen K, Cox GM, Wang P, Toffaletti DL, Perfect JR, Heitman J. 2003. Sexual cycle of *Cryptococcus neoformans* var. *grubii* and virulence of congenic  $\alpha$  and  $\alpha$  isolates. *Infect Immun*, 71:4831-4841.
